# Supplementary material
Source: publisher figshare collection journal article supplement (https://acs.figshare.com/ndownloader/files/4652953)
Supplement: Supplementary file 1 [file 4652953]

*Supporting Information*

**Catalytic Reactivity of a Zirconium(IV) Redox-Active Ligand Complex with 1,2-Diphenylhydrazine**

Karen J. Blackmore, Neetu Lal, Joseph W. Ziller, and Alan F. Heyduk\*

*Department of Chemistry, University of California, Irvine, California, 92697*

| <b><u>Contents</u></b>         | <b><u>Page</u></b> |
|--------------------------------|--------------------|
| Experimental Procedures        | S2                 |
| X-ray Crystallographic Details | S5                 |
| Further Discussion             | S8                 |
| References                     | S9                 |

## Experimental Procedures

**General Experimental Considerations.** The complexes described below are extremely air- and moisture sensitive. All manipulations were carried out under an atmosphere of argon or nitrogen gas using standard Schlenk, vacuum-line, and glovebox techniques. High-purity solvents were first sparged with argon and then purified dried by passage through activated alumina and Q5 columns to remove water and oxygen, respectively. The metal salt  $\text{ZrCl}_4$  was purchased from Alfa-Aesar and used as received.  $\text{Zr}(\text{NMePh})_4$  was prepared according to literature procedures<sup>1</sup>. All complexes were characterized by  $^1\text{H}$  and  $^{13}\text{C}$  NMR spectroscopy, IR spectroscopy, and elemental analysis. NMR spectra were collected on Bruker Avance 500 or 600 MHz spectrometers in either benzene- $d_6$  or THF- $d_8$  solvents that were degassed by several freeze-pump-thaw cycles, dried over sodium benzophenone ketyl radical, and vacuum-distilled before use.  $^1\text{H}$  and  $^{13}\text{C}$  NMR spectra were referenced to TMS using the residual  $^1\text{H}$  and natural abundance  $^{13}\text{C}$  impurities, respectively, of the solvent. All chemical shifts are reported using the standard  $\delta$  notation in parts-per-million. Infrared spectra were recorded on a Perkin-Elmer Spectrum One spectrophotometer as KBr pellets. Elemental analyses were provided by Desert Analytics and Schwarzkopf Microanalytical Laboratory, Inc.

***N,N'*-bis(3,5-di-*tert*-butyl-2-hydroxyphenyl)-1,2-phenylenediamine  $\text{H}_4[\text{N}_2\text{O}_2^{\text{red}}]$ .** The same procedure as previously reported was used with an additional purification step<sup>2</sup>. After collection of the yellow product the solid is dissolved in ether (30 mL) and run through a silica plug (150 mL medium frit 2/3 full) of 100% ether. A blue solution is collected in about 250 mL of ether which is concentrated to dryness. The blue solid is stirred in pentane for 1 hour or until a fine white powder is observed in a blue solution. The white solid is collected, washed with pentane and dried under vacuum. Overall yield 40-44%.

**[N<sub>2</sub>O<sub>2</sub><sup>red</sup>]Zr(THF)<sub>3</sub> (1).** In a 20 ml scintillation vial, a 10 ml ether solution containing 1.93 mmol of [N<sub>2</sub>O<sub>2</sub><sup>red</sup>]Li<sub>4</sub> (1 equiv, prepared in situ from 1.00 g of H<sub>4</sub>[N<sub>2</sub>O<sub>2</sub><sup>red</sup>] and 2.86 ml of 2.71 M *n*-butyllithium) was frozen in a liquid-nitrogen cold well. Immediately upon thawing, the apLi<sub>2</sub> mixture was added to a stirring suspension of 0.46 g of ZrCl<sub>4</sub>THF<sub>2</sub> (1.93 mmol, 1 equiv) in cold pentane/THF (3 ml). The reaction mixture was allowed to warm to 26 °C and was stirred overnight affording an orange solution with a white precipitate. Filtration and solvent removal gave an orange residue that was triturated with pentane (3 x 10 mL), and then cooled to –35 °C. Collection of the yellow crystals gave 0.26 mg of **1** (55% yield). X-ray quality crystals of **5** were obtained by chilling saturated ether solutions of the complex to –35 °C. Anal. Calcd. for C<sub>46</sub>H<sub>68</sub>N<sub>2</sub>O<sub>5</sub>Zr: C, 67.36; H, 8.36; N, 3.42. Found: C, 67.42; H, 8.39; N, 3.20. <sup>1</sup>H NMR (600 MHz, C<sub>6</sub>D<sub>6</sub>) δ/ppm: 0.87 (*s*, 12H, THF), 1.50 (*s*, 18H, C(CH<sub>3</sub>)<sub>3</sub>), 1.67(*s*, 18H, C(CH<sub>3</sub>)<sub>3</sub>), 3.81 (*s*, 12H, THF), 6.98 (*q*, 2H, aryl-*H*, <sup>3</sup>*J*<sub>HH</sub> = 4.2 Hz), 7.08 (*d*, 2H, aryl-*H*, <sup>3</sup>*J*<sub>HH</sub> = 2.4 Hz), 7.83 (*q*, 2H, aryl-*H*, <sup>3</sup>*J*<sub>HH</sub> = 2.4 Hz), 7.93 (*d*, 2H, aryl-*H*, <sup>3</sup>*J*<sub>HH</sub> = 4.2 Hz). <sup>13</sup>C NMR (125.8 MHz, C<sub>6</sub>D<sub>6</sub>) δ/ppm: 30.4 (C(CH<sub>3</sub>)<sub>3</sub>), 32.5 (C(CH<sub>3</sub>)<sub>3</sub>), 34.9 (C(CH<sub>3</sub>)<sub>3</sub>), 109.4 (aryl-C), 109.7 (aryl-C), 113.3 (aryl-C), 118.8 (aryl-C), 132.2 (aryl-C), 139.2 (aryl-C), 145.5 (aryl-C), 147.2 (aryl-C), 156.3 (aryl-C).

**[N<sub>2</sub>O<sub>2</sub><sup>ox</sup>]ZrCl<sub>2</sub>(THF) (2).** Complex **1** (0.40 g, 0.49 mmol) was dissolved in 8 mL of ether and the solution was frozen in a coldwell. Upon melting, freshly prepared PhICl<sub>2</sub> (0.134 g, 0.49 mmol) was added as a solid. The solution was shaken until all the PhICl<sub>2</sub> dissolved (2-3 min). The solution changed from yellow to dark green. A dark green precipitate began forming and the solution was placed at -35 °C overnight. The solution was filtered and a dark green microcrystalline solid was collected (153 mg, 42% yield). Anal. Calcd. for C<sub>38</sub>H<sub>52</sub>N<sub>2</sub>O<sub>3</sub>Cl<sub>2</sub>Zr: C, 61.10; H, 7.02; N, 3.75. Found: C, 60.87; H, 7.56; N, 3.68. <sup>1</sup>H NMR (600 MHz, C<sub>6</sub>D<sub>6</sub>) δ/ppm:

1.32 (*s*, 18H, C(CH<sub>3</sub>)<sub>3</sub>), 1.70 (*s*, 18H, C(CH<sub>3</sub>)<sub>3</sub>), 6.35 (*q*, 2H, aryl-*H*, <sup>3</sup>*J*<sub>HH</sub> = 3.6 Hz), 7.52 (*q*, 2H, aryl-*H*, <sup>3</sup>*J*<sub>HH</sub> = 3.6 Hz), 7.63 (*s*, 2H, aryl-*H*), 7.68 (*s*, 2H, aryl-*H*). <sup>13</sup>C NMR (125.8 MHz, d8-THF) δ/ppm: 27.3 (C(CH<sub>3</sub>)<sub>3</sub>), 31.0 (C(CH<sub>3</sub>)<sub>3</sub>), 32.5 (C(CH<sub>3</sub>)<sub>3</sub>), 117.7 (aryl-C), 124.9 (aryl-C), 129.5 (aryl-C), 129.9 (aryl-C), 134.5 (aryl-C), 141.0 (aryl-C), 143.1 (aryl-C), 145.9 (aryl-C), 153.8 (aryl-C). UV-Vis λ<sub>max</sub> = 945 nm

**Disproportionation Reactions of 1 with 1,2-diphenylhydrazine.** In a typical experiment, complex **1** (20 mg, 1 equiv) and 1,2-diphenylhydrazine (45 mg, 10 equiv.) were weighed into a NMR tube and C<sub>6</sub>D<sub>6</sub> was added. Both reagents dissolved and the solution turned green within a minute (UV-Vis λ<sub>max</sub> = 739 nm). The reaction was monitored by NMR for conversion to azobenzene. Once the reaction was complete, GC/MS confirmed the formation of both aniline and azobenzene in a two to one molar ratio.

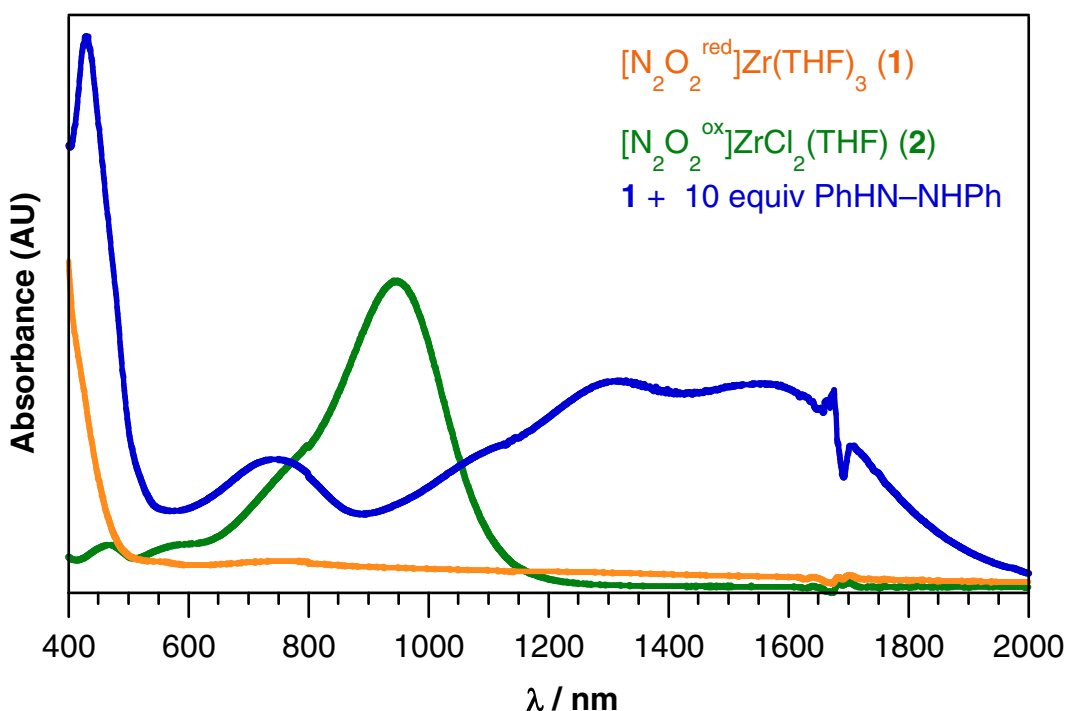

**Figure S1.** Representative UV-vis spectra of **1**, **2** and an *in situ* reaction between **1** and 1,2-diphenylhydrazine.



## X-ray Crystallographic Details

[N<sub>2</sub>O<sub>2</sub><sup>red</sup>]Zr(THF)<sub>3</sub> (**1**). A yellow crystal of approximate dimensions 0.06 x 0.27 x 0.40 mm was mounted on a glass fiber and transferred to a Bruker CCD platform diffractometer. The SMART<sup>3</sup> program package was used to determine the unit-cell parameters and for data collection (25 sec/frame scan time for a sphere of diffraction data). The raw frame data was processed using SAINT<sup>4</sup> and SADABS<sup>5</sup> to yield the reflection data file. Subsequent calculations were carried out using the SHELXTL<sup>6</sup> program. The diffraction symmetry was *2/m* and the systematic absences were consistent with the centrosymmetric monoclinic space group *P2<sub>1</sub>/c* that was later determined to be correct.

The structure was solved by direct methods and refined on  $F^2$  by full-matrix least-squares techniques. The analytical scattering factors<sup>7</sup> for neutral atoms were used throughout the analysis. Hydrogen atoms were included using a riding model.

Least-squares analysis yielded  $wR2 = 0.2313$  and  $Goof = 1.095$  for 482 variables refined against 7929 data ( $0.85\text{\AA}$ ),  $R1 = 0.0713$  for those 6431 data with  $I > 2.0\sigma(I)$ . There were several large residual peaks observed in the final difference-Fourier map. These peaks were probably due to solvent, which could not be identified.

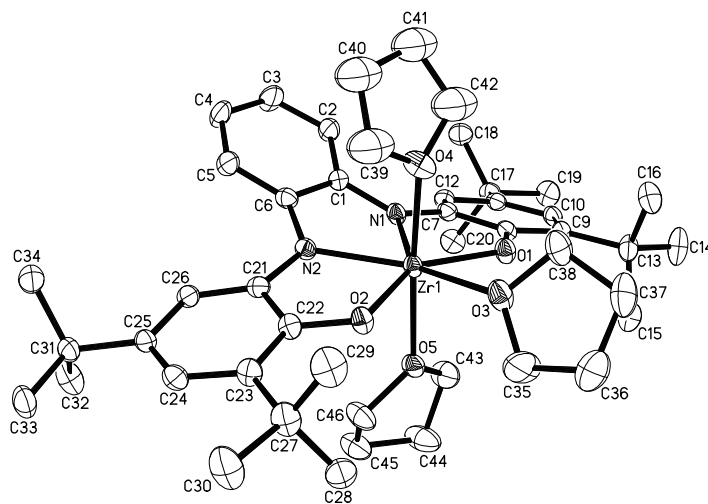

**[N<sub>2</sub>O<sub>2</sub><sup>ox</sup>]ZrCl<sub>2</sub>(THF) (2).** A blue crystal of approximate dimensions 0.07 x 0.15 x 0.31 mm was mounted on a glass fiber and transferred to a Bruker CCD platform diffractometer. The SMART<sup>3</sup> program package was used to determine the unit-cell parameters and for data collection (45 sec/frame scan time for a hemisphere of diffraction data). The raw frame data was processed using SAINT<sup>4</sup> and SADABS<sup>5</sup> to yield the reflection data file. Subsequent calculations were carried out using the SHELXTL<sup>6</sup> program. The diffraction symmetry was *mmm* and the systematic absences were consistent with the orthorhombic space groups *Pna2*<sub>1</sub> and *Pnma*. It was later determined that space group *Pna2*<sub>1</sub> was the best choice for the final least-squares refinement.

The structure was solved by direct methods and refined on F<sup>2</sup> by full-matrix least-squares techniques. The analytical scattering factors<sup>7</sup> for neutral atoms were used throughout the analysis. Hydrogen atoms were included using a riding model. Carbon atoms C(24), C(25), C(26), C(28), C(29) and C(30) were disordered and included using multiple components, partial site-occupancy-factors and isotropic thermal parameters.

Least-squares analysis yielded wR2 = 0.1623 and Goof = 1.039 for 450 variables refined against 6247 data (0.85Å), R1 = 0.0564 for those 4382 data with I > 2.0σ(I). The structure was refined as a racemic twin (BASF = 0.44(8)).

The structure could also be solved in the centrosymmetric space group *Pnma*, however, this solution proved less satisfactory. The molecule is located on a mirror plane resulting in disorder of the THF ligand and the THF solvent molecule. In general, thermal parameters on several carbon atoms were higher than expected and became non-positive-definite when refined anisotropically. R1 and wR2 are also significantly higher (wR2 ≈ 40%) in space group *Pnma*.

While space group *Pnma* should be considered as an alternative, it was decided that the structure was better described using the non-centrosymmetric space group *Pna2*<sub>1</sub>.

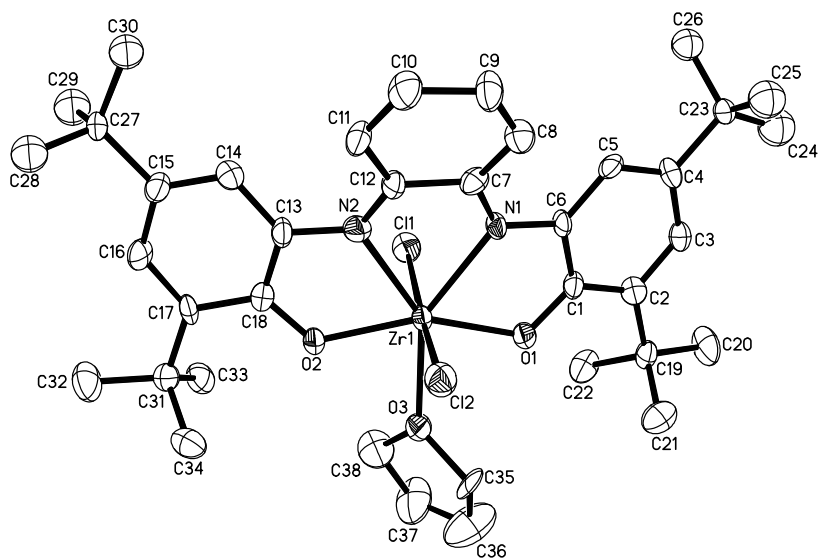



## Further Discussion

**Alternative Zirconium Oxidants.** We have also considered the possibility of homolytic N–N bond cleavage pathways that might lead to the observed disproportionation of 1,2-diphenylhydrazine to aniline and azobenzene. Two related mechanisms are shown in Scheme S1. In path A, N–N oxidative addition to **1a** would afford a putative bis(amide) complex,  $[\text{N}_2\text{O}_2^{\text{ox}}]\text{Zr}(\text{NHPh})_2\text{L}$ . This species could be the active oxidant with each amide ligand abstracting a hydrogen atom from another molecule of 1,2-diphenylhydrazine. In path B, homolytic cleavage of the N–N bond of 1,2-diphenylhydrazine would release a  $\text{PhHN}\cdot$  radical and a putative monoamide radical complex,  $[\text{N}_2\text{O}_2\cdot]\text{Zr}(\text{NHPh})\text{L}_2$  ( $[\text{N}_2\text{O}_2\cdot]^{3-}$  is the one-electron oxidized form of the redox active ligand). These two species could independently abstract hydrogen atoms from 1,2-diphenylhydrazine.

**Scheme S1**

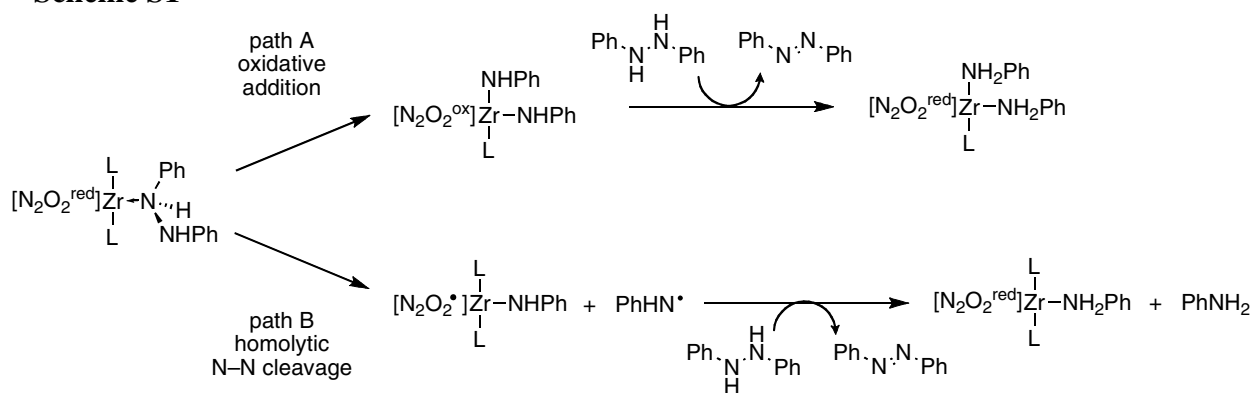

We discount both mechanisms shown in Scheme S1 based on the lack of reaction observed for mixtures of **1a** with tetramethylhydrazine and 1-dimethylaminopyridine. According to path A of Scheme S1, tetramethylhydrazine could oxidatively add to **1a** to form  $[\text{N}_2\text{O}_2^{\text{ox}}]\text{Zr}(\text{NMe}_2)_2\text{L}$ . Alternatively, if tetramethylhydrazine reacted according to path B, it would generate  $\text{Me}_2\text{N}\cdot$  and  $[\text{N}_2\text{O}_2\cdot]\text{Zr}(\text{NMe}_2)\text{L}_2$ . When **1a** is mixed with tetramethylhydrazine, no reactivity is observed, even after 24 hours, and both **1a** and tetramethylhydrazine can be recovered from the reaction.

The same result was obtained for 1-dimethylaminopyridine. These results suggest that homolytic N–N cleavage (with or without oxidative addition) is not the operating pathway in the catalytic decomposition of 1,2-diphenylhydrazine by **1a**.

## References

- (1) LoCoco, M. D.; Zhang, X.; Jordan, R. F. *J. Am. Chem. Soc.* **2004**, *126*, 15231-15244.
- (2) Chaudhuri, P.; Hess, M.; Müller, J.; Hildenbrand, K.; Bill, E.; Weyhermüller T., Wieghardt, K. *J. Am. Chem. Soc.* **1999**, *121*, 9599-9610.
- (3) SMART Software Users Guide, Version 5.1, Bruker Analytical X-Ray Systems, Inc.; Madison, WI 1999.
- (4) SAINT Software Users Guide, Version 6.0, Bruker Analytical X-Ray Systems, Inc.; Madison, WI 1999.
- (5) Sheldrick, G. M. SADABS, Version 2.10, Bruker Analytical X-Ray Systems, Inc.; Madison, WI 2002.
- (6) Sheldrick, G. M. SHELXTL Version 6.12, Bruker Analytical X-Ray Systems, Inc.; Madison, WI 2001.
- (7) International Tables for X-Ray Crystallography 1992, Vol. C., Dordrecht: Kluwer Academic Publishers.
